# Supplementary material for: RT-qPCR Diagnostics: The “Drosten” SARS-CoV-2 Assay Paradigm
Source: MDPI journal article supplement (doi:10.3390/ijms22168702), 2021-08-13
Supplement: s1 [file s1]

A

|                 | TaqPath      | GSD          | Quanta       | PrimeScript  | Luna         | Biorad       | Sigma        | PCRBio       | Sansure      |
|-----------------|--------------|--------------|--------------|--------------|--------------|--------------|--------------|--------------|--------------|
| Cq1             | 23.53        | 23.24        | 24.29        | 24.41        | 24.90        | 25.49        | 26.38        | 24.39        | 25.32        |
| Cq2             | 23.00        | 23.25        | 24.00        | 23.97        | 24.97        | 25.35        | 26.36        | 24.07        | 25.19        |
| Cq3             | 22.81        | 23.17        | 24.01        | 24.36        | 24.59        | 24.84        | 26.21        | 24.19        | 25.19        |
| Cq4             | 23.88        | 23.87        | 25.19        | 24.68        | 24.80        | 24.85        | 26.63        | 24.05        | 25.05        |
| Cq5             | 23.35        | 23.53        | 24.70        | 25.91        | 25.49        | 25.65        | 27.04        | 24.69        | 25.24        |
| Average         | <b>23.31</b> | <b>23.41</b> | <b>24.44</b> | <b>24.67</b> | <b>24.95</b> | <b>25.24</b> | <b>26.53</b> | <b>24.28</b> | <b>25.20</b> |
| Min             | 22.81        | 23.17        | 24.00        | 23.97        | 24.59        | 24.84        | 26.21        | 24.05        | 25.05        |
| Max             | 23.88        | 23.87        | 25.19        | 25.91        | 25.49        | 25.65        | 27.04        | 24.69        | 25.32        |
| $\Delta Cq$     | 1.07         | 0.70         | 1.19         | 1.94         | 0.91         | 0.80         | 0.84         | 0.64         | 0.27         |
| Fold-difference | 2.10         | 1.62         | 2.29         | 3.85         | 1.87         | 1.75         | 1.79         | 1.55         | 1.21         |
|                 |              |              |              |              |              |              |              |              |              |
|                 | Overall      |              |              |              |              |              |              |              |              |
| Average         | 24.67        |              |              |              |              |              |              |              |              |
| Min             | 22.81        |              |              |              |              |              |              |              |              |
| Max             | 27.04        |              |              |              |              |              |              |              |              |
| $\Delta Cq$     | 4.23         |              |              |              |              |              |              |              |              |
| Fold-difference | 18.77        |              |              |              |              |              |              |              |              |

B

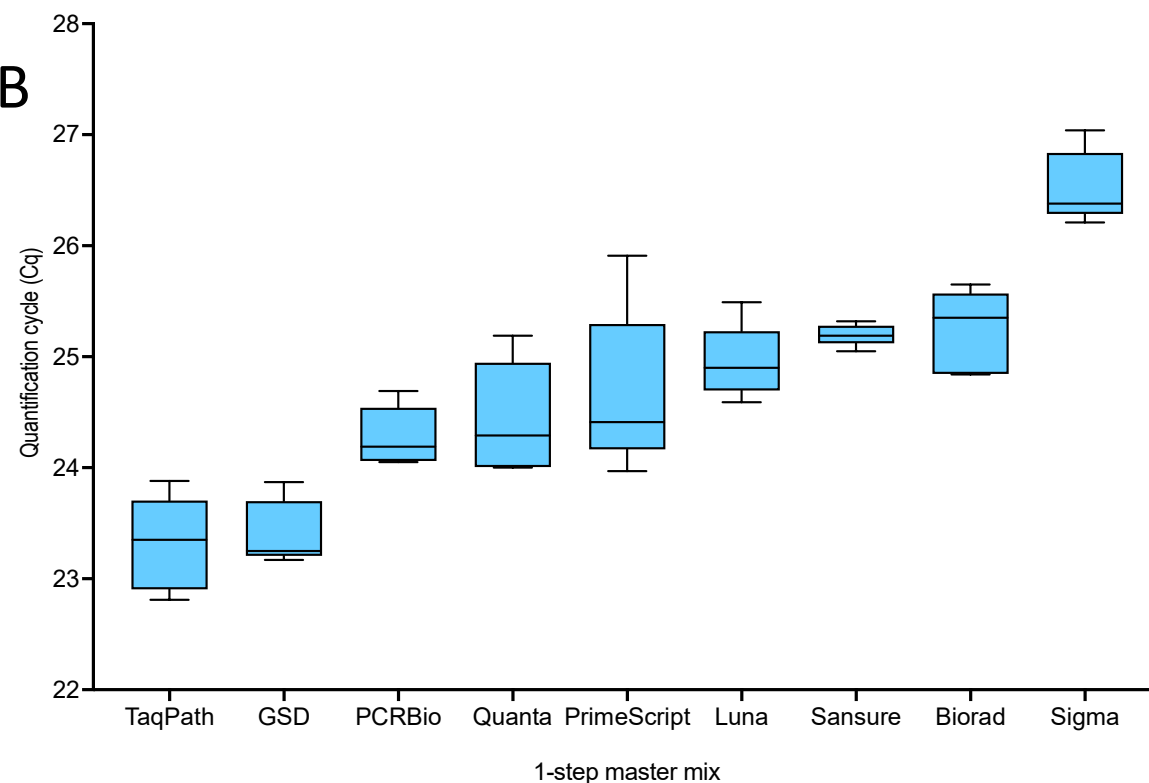

Figure S1. Performance of a commercial SARS-CoV-2 primer and probe set with nine different 1-step master mixes. (A) Quantification cycles (Cqs). (B) Plot of the Cqs ordered by the average Cq. The minimum Cq recorded is 22.81, the maximum one 27.04. This  $\Delta Cq$  of 4.23 corresponds to an apparent 19-fold difference for the same amount of input RNA.
